# Supplementary material
Source: PubMed Central journal article supplement (PMC4618491)
Supplement: NIHMS729721-supplement-Supp_Table_1.pdf [file NIHMS729721-supplement-Supp_Table_1.pdf]

| Characteristic         | All Patients (N=116) | Notch1 Gene Copy |         |
|------------------------|----------------------|------------------|---------|
|                        |                      | >3               | <3      |
| KRAS no./total no. (%) |                      |                  |         |
| Wild-type              | 80 (69)              | 16 (20)          | 64 (80) |
| Mutant                 | 36 (31)              | 8 (22)           | 28 (88) |
| PIK3CA                 |                      |                  |         |
| Wild-type              | 108 (93)             | 23 (22)          | 85 (78) |
| Mutant                 | 8 (7)                | 1 (13)           | 7 (87)  |
| CTNNB1                 |                      |                  |         |
| Wild-type              | 107 (92)             | 24 (22)          | 83 (78) |
| Mutant                 | 9 (8)                | 0 (0)            | 9 (100) |
| BRAF                   |                      |                  |         |
| Wild-type              | 111 (96)             | 23 (22)          | 88 (78) |
| Mutant                 | 5 (4)                | 1 (20)           | 4 (80)  |
| NRAS                   |                      |                  |         |
| Wild-type              | 107 (92)             | 23 (21)          | 84 (79) |
| Mutant                 | 9 (8)                | 1 (11)           | 8 (89)  |

**Supplemental Table 1**
