# Supplementary material
Source: PubMed Central journal article supplement (PMC4618491)
Supplement: NIHMS729721-supplement-Supp_Table_2.pdf [file NIHMS729721-supplement-Supp_Table_2.pdf]

| CRC Explant | Colon or Rectal | Primary or Metastatic | Stage | Age at consent | Previous Treatment                                                    | KRAS | NRAS | PIK3CA | APC | CTNNB1 |
|-------------|-----------------|-----------------------|-------|----------------|-----------------------------------------------------------------------|------|------|--------|-----|--------|
| CRC 001     | Colon           | Primary               | IV    | 69             | FOLFOX + bevacizumab                                                  | G12D | WT   | WT     | Mut | WT     |
| CRC 006     | Colon           | Primary               | IV    | 42             | Capecitabine+ radiation, FOLFOX + bevacizumab, irinotecan + cetuximab | G12D | WT   | WT     | Mut | WT     |
| CRC 007     | Colon           | Primary               | II    | 47             | None                                                                  | G13D | WT   | WT     | WT  | Mut    |
| CRC 010     | Rectal          | Primary               | III   | 52             | None                                                                  | WT   | WT   | WT     | WT  | WT     |
| CRC 021     | Rectal          | Primary               | II    | 72             | None                                                                  | G12D | WT   | WT     | WT  | WT     |
| CRC 026     | Colon           | Metastatic            | IV    | 48             | FOLFOX and bevacizumab                                                | WT   | Q61K | WT     | Mut | WT     |
| CRC 027     | Colon           | Metastatic            | IV    | 56             | None                                                                  | G12A | WT   | WT     | Mut | WT     |
| CRC 034     | Colon           | Primary               | IV    | 59             | None                                                                  | WT   | WT   | WT     | WT  | WT     |
| CRC 036     | Rectal          | Metastatic            | IV    | 42             | Capecitabine+ radiation, FOLFOX + bevacizumab, irinotecan + cetuximab | G12A | WT   | WT     | Mut | WT     |
| CRC 040     | Rectal          | Primary               | II    | 63             | None                                                                  | G12V | WT   | Mut    | Mut | WT     |
| CRC 042     | Rectal          | Primary               | II    | 73             | FOLFIRI + bevacizumab                                                 | G13D | WT   | WT     | WT  | Mut    |
| CRC 098     | Colon           | Metastatic            | IV    | 50             | None                                                                  | G13D | WT   | Mut    | Mut | WT     |
| CRC 102     | Rectal          | Metastatic            | IV    | 55             | FOLFOX                                                                | G12V | WT   | WT     | WT  | WT     |
| CRC 108     | Colon           | Metastatic            | IV    | 44             | Capecitabine + oxaliplatin + bevacizumab                              | G12C | WT   | WT     | WT  | WT     |
| CRC 125     | Rectal          | Metastatic            | IV    | 58             | Unknown                                                               | WT   | WT   | WT     | WT  | WT     |

## Supplemental Table 2
