# Supplementary material
Source: PubMed Central journal article supplement (PMC4618491)
Supplement: NIHMS729721-supplement-Supp_Table_3_and_Supp_Fig_2.pdf [file NIHMS729721-supplement-Supp_Table_3_and_Supp_Fig_2.pdf]

| CRC explant | Notch1 Mean | CEP Mean | Notch1/CEP9 | Notch1 Gain |
|-------------|-------------|----------|-------------|-------------|
| CRC125      | 4.38        | 4        | 1.1         | Yes         |
| CRC001      | 3.6         | 2.79     | 1.22        | Yes         |
| CRC040      | 3.6         | 2.64     | 1.36        | Yes         |
| CRC036      | 3.58        | 2.07     | 1.73        | Yes         |
| CRC034      | 3.54        | 2.34     | 1.51        | Yes         |
| CRC098      | 2.94        | 3.26     | 0.9         | No          |
| CRC027      | 2.72        | 2.3      | 1.18        | No          |
| CRC102      | 2.58        | 2.66     | 0.97        | No          |
| CRC007      | 2.34        | 1.94     | 1.21        | No          |
| CRC010      | 2.28        | 2.06     | 1.06        | No          |
| CRC021      | 2.16        | 2.12     | 1.02        | No          |
| CRC108      | 2.14        | 2.02     | 1.06        | No          |
| CRC026      | 2.12        | 2.08     | 1.02        | No          |
| CRC006      | 2.06        | 1.84     | 1.12        | No          |
| CRC042      | 1.96        | 1.76     | 1.11        | No          |

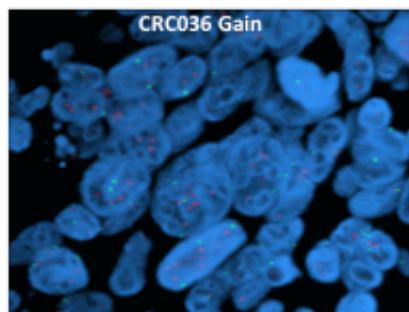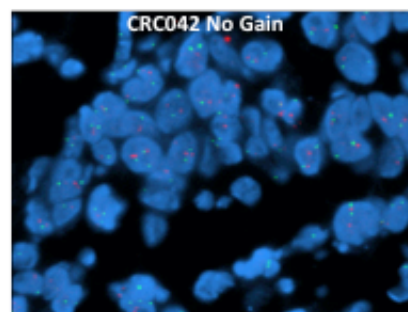

**Supplemental Table 3 and Supplemental Figure 2**
