# Supplementary material
Source: PubMed Central journal article supplement (PMC4618491)

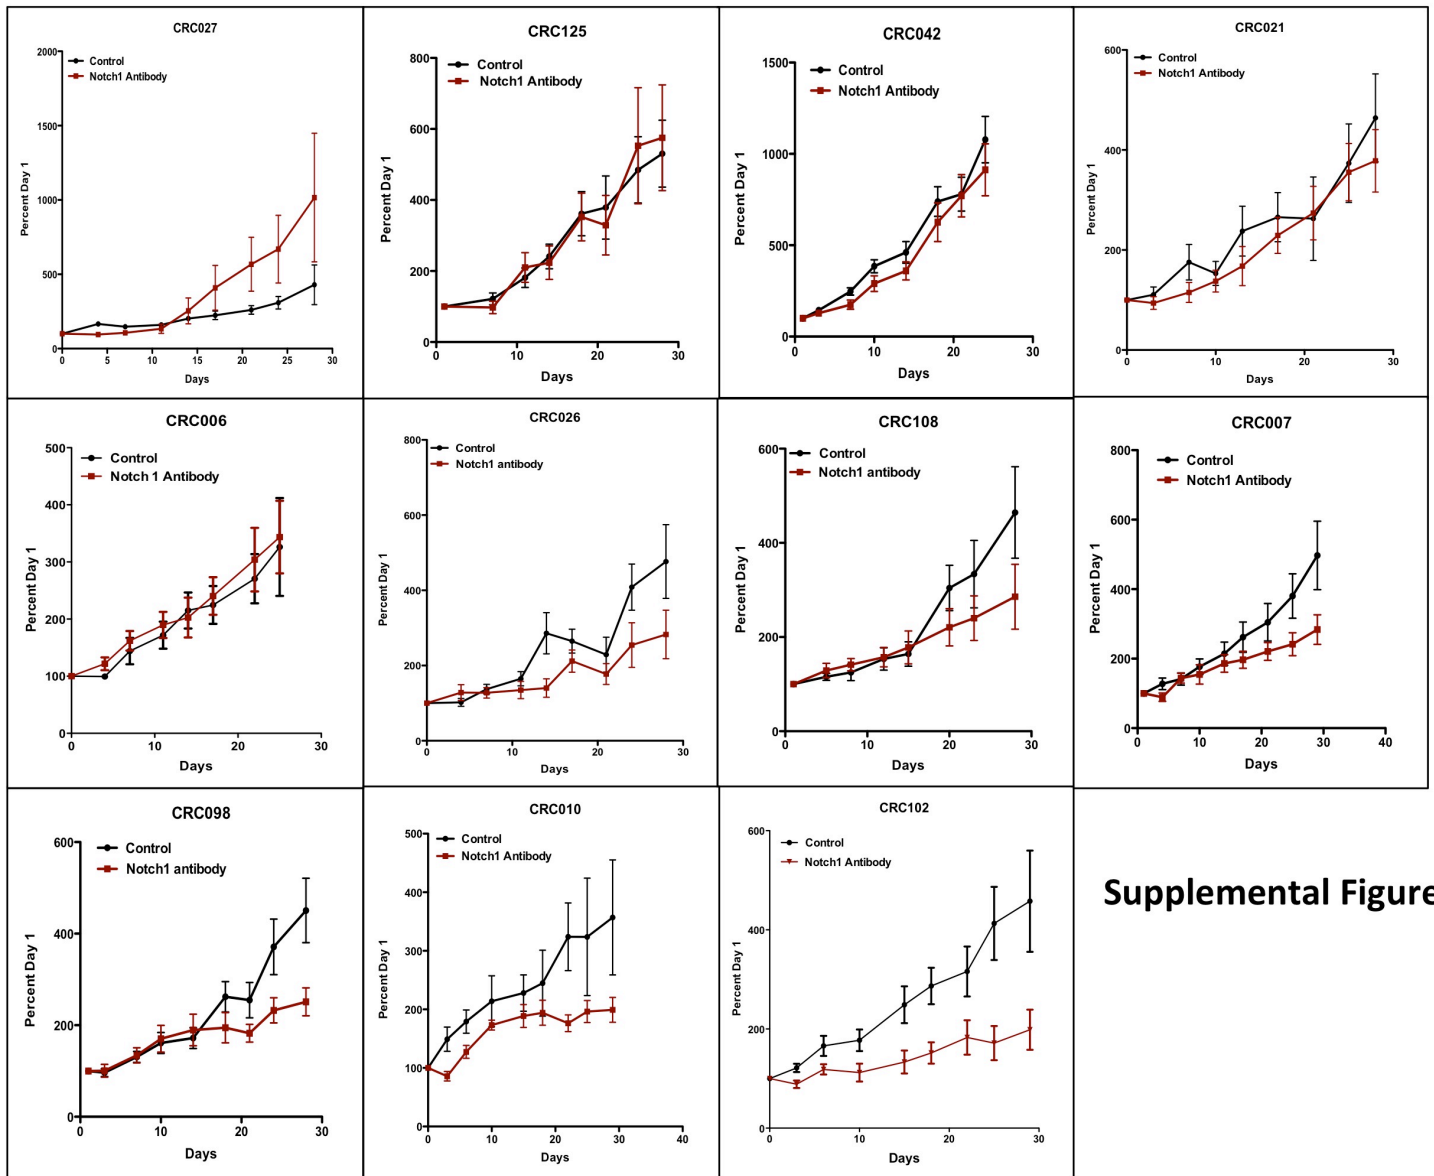

**Supplemental Figure 1**

Supplement: NIHMS729721-supplement-Supp_Fig_1.pdf [file NIHMS729721-supplement-Supp_Fig_1.pdf]

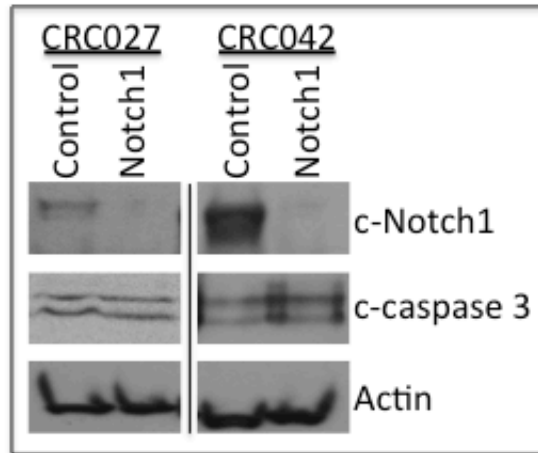

**Supplemental Figure 3**

Supplement: NIHMS729721-supplement-Supp_Fig_3.pdf [file NIHMS729721-supplement-Supp_Fig_3.pdf]
